# Supplementary material
Source: Royal Society of Chemistry journal article supplement (doi:10.1039/d5nj04275e)
Supplement: d5nj04275e1.pdf [file d5nj04275e1.pdf]

## Electronic Supporting information

### A Multifunctional Chitosan-Anchored Copper(I)Oxide/Zinc Oxide Nanoplatfom for High-Capacity Fluoride Capture in Eco-Intelligent Water Systems

Manojna R. Nayak,<sup>a</sup> Ravindra R. Kamble,<sup>a,\*</sup> Vishwa B. Nadoni,<sup>a</sup> Mallika Wali,<sup>a</sup> Amruta Patri,<sup>a</sup> Ashok M. Sajjan<sup>b</sup>

<sup>a</sup> Department of Studies in Chemistry, Karnatak University, Dharwad, 580003, India

<sup>b</sup> Department of Chemistry, KLE Technological University, Hubballi, 580031, India

### Table of Contents

| Sl. No. | Particulars                                                              | Page No. |
|---------|--------------------------------------------------------------------------|----------|
| 1       | Collection of <i>Spathodea Campanulata</i> buds and extraction of liquid | 2        |
| 2       | UV-Vis spectrum of <i>Spathodea Campanulata</i>                          | 2        |
| 3       | FTIR spectrum of <i>Spathodea Campanulata</i>                            | 4        |
| 4       | GCMS profile of <i>Spathodea Campanulata</i>                             | 5        |
| 5       | Effect of Coexisting Ions on Fluoride Adsorption                         | 6        |
| 6       | Fluoride Adsorption in Model vs Real Water Matrices                      | 7        |
| 7       | Cycling Performance and Regeneration Efficiency                          | 8        |

### 1. Collection of *Spathodea campanulata* buds and extraction of liquid.

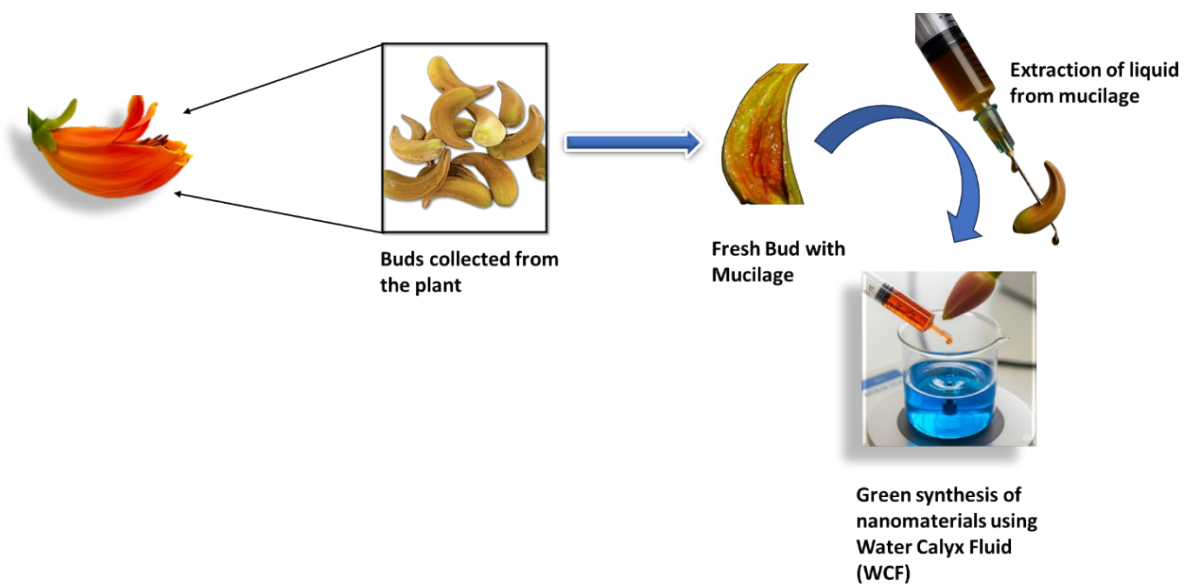

**Fig. S1.** Extraction process of *Spathodea campanulata* water calyx fluid (WCF).

### 2. UV-Vis spectrum of *Spathodea campanulata*

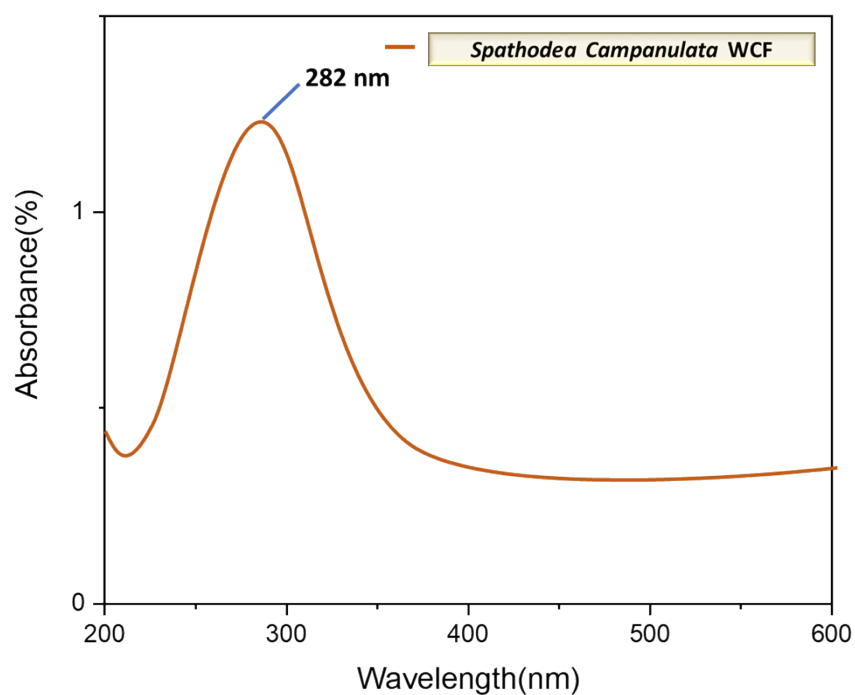

**Fig. S2.** UV-Visible spectrum of *Spathodea campanulata* water calyx fluid.

The UV–Visible spectral analysis of *Spathodea campanulata* water calyx fluid (WCF) offers profound insight into its intricate phytochemical milieu while concurrently delineating its operative significance in nanomaterial biogenesis. The spectrum is typified by conspicuous absorption maxima emanating from an array of polyphenolic consortia, including flavonoids, tannins, phenolics, and anthocyanins metabolites universally extolled for their redox versatility and molecular capping propensities. The salient absorption band within the 270–290 nm corridor is unequivocally ascribed to  $\pi\rightarrow\pi^*$  transitions inherent to extended aromatic scaffolds and conjugated carbonyl chromophores, emblematic of phenolic and flavonoid frameworks. Such delocalized  $\pi$ -electronic architectures confer facile electron mobilization, thereby enabling these biomolecules to function as potent reducing mediators, driving the transformation of metal precursors into nanoscale entities.

## 2. FTIR spectrum of *Spathodea Campanulata* water calyx fluid

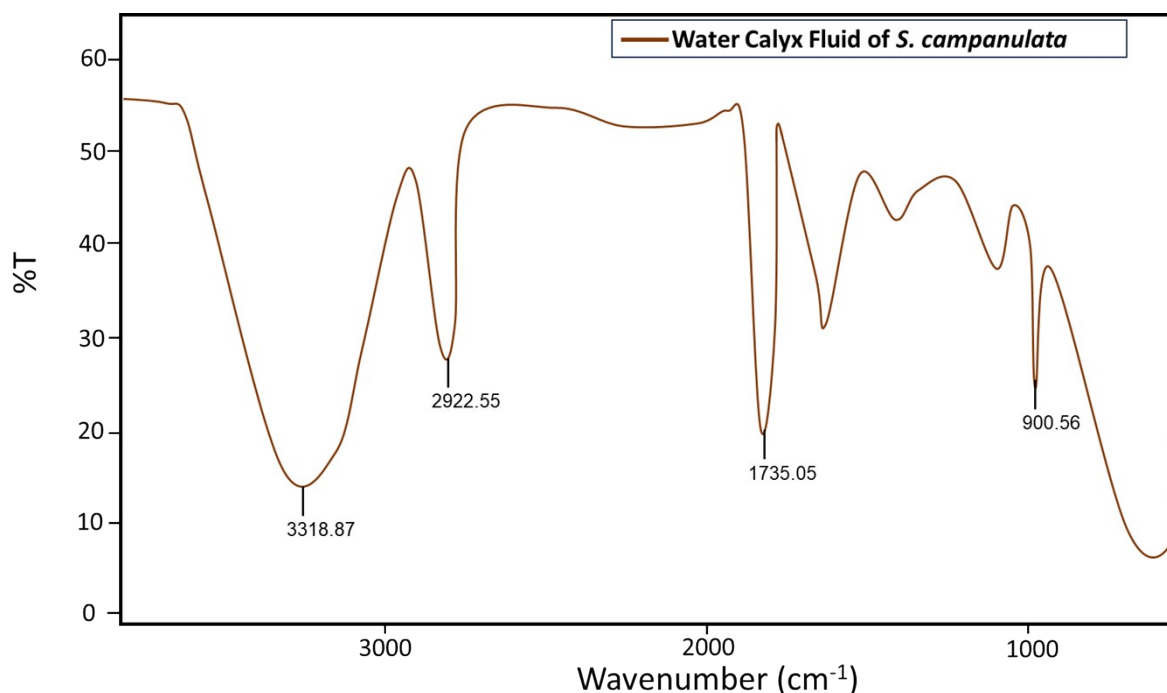

**Fig. S3.** FTIR spectrum of *Spathodea campanulata* Water Calyx Fluid.

The FTIR spectrum of *Spathodea campanulata* water calyx fluid (WCF) delineates a complex molecular framework that underscores the diversity of its phytochemical repertoire. The broad, intense absorption band at 3318 cm<sup>-1</sup> corresponds to O–H stretching vibrations of hydroxyl functionalities, emblematic of phenolics and alcohols, and indicative of extensive hydrogen bonding among bioactive constituents. The band observed at 2922 cm<sup>-1</sup> is ascribed to aliphatic C–H stretching of saturated hydrocarbons, reflecting the presence of terpenoid or fatty acid

derivatives. A distinct peak at  $1735\text{ cm}^{-1}$  signifies carbonyl (C=O) stretching, attributable to esters, aldehydes, or other oxidized phytometabolites typically encountered in plant extracts.

The absorption near  $1647\text{ cm}^{-1}$  is consistent with aromatic C=C stretching or conjugated C=O vibrations, reinforcing the abundance of flavonoids and other conjugated aromatic frameworks. Strong bands in the  $1242\text{--}1048\text{ cm}^{-1}$  domain can be assigned to C–O stretching vibrations of alcohols, ethers, and glycosidic linkages, suggesting the presence of polysaccharides and secondary metabolites with oxygenated functionalities. The fingerprint region ( $900\text{--}650\text{ cm}^{-1}$ ) reveals characteristic aromatic C–H bending vibrations, confirming the prevalence of aromatic phytoconstituents.

Taken together, these vibrational signatures validate the phytochemical complexity of *S. campanulata* WCF, highlighting the coexistence of hydroxyl, carbonyl, aromatic, and glycosidic groups that endow the extract with dual functionalities as a robust reducing agent for metal ion biotransformation and as a stabilizing matrix to prevent nanoparticle aggregation. This molecular richness rationalizes its efficacy as a sustainable medium for green nanomaterial synthesis.

### 3. Comparative Adsorption Efficiency of Different Fluoride Adsorbents.

**Table S1.** Evaluating the Relative Adsorption Performance of Different Fluoride Adsorbents.

| Adsorbent Material                                          | Adsorption Capacity (mg/g) | Key Features / Notes                                        | Reference                |
|-------------------------------------------------------------|----------------------------|-------------------------------------------------------------|--------------------------|
| Activated Alumina                                           | 1.2 – 1.8                  | Inexpensive, widely used, but poor efficiency at neutral pH | Roy et al., 2021         |
| Acid-activated Alumina (AAA)                                | 69.5                       | Enhanced surface activity after acid treatment              | Karunanithi et al., 2019 |
| Mg–Al Mixed Oxide (Mg/Al = 1:2)                             | 45.3                       | Ion-exchange mechanism, moderate capacity                   | Singh et al., 2008       |
| $\gamma\text{-Al}_2\text{O}_3/\gamma\text{-Fe}_2\text{O}_3$ | 105.0                      | Nanostructured mixed                                        | Roy et al.,              |

|                                                        |           |                                                                                                                                                                          |                     |
|--------------------------------------------------------|-----------|--------------------------------------------------------------------------------------------------------------------------------------------------------------------------|---------------------|
| Nanocomposite                                          |           | oxide, moderate fluoride uptake                                                                                                                                          | 2021                |
| Pectin-based Fe–Al–Ni Trimetallic Composite (PFAN)     | 285.0     | Biopolymer-assisted composite, improved adsorption                                                                                                                       | Sharma et al., 2017 |
| Chitosan/Fe–Al Oxide Nanocomposite                     | 310 – 350 | Biopolymer matrix with metal oxide reinforcement                                                                                                                         | Ramesh et al., 2019 |
| Cs-Cu <sub>2</sub> O/ZnO nanocomposite (Present Study) | ~1000.0   | Rich in hydroxyl, amino, carbonyl, and aromatic groups from chitosan + phytochemicals; Cu <sub>2</sub> O/ZnO synergy enhances active sites; eco-friendly green synthesis | Present work        |

#### 4. GCMS profile of *Spathodea Campanulata* Water Calyx Fluid

**Table S2.** Phytochemical Composition of *Spathodea campanulata* Water Calyx Fluid via GC–MS Analysis (Martin et al., 2019; Khandbahale et al., 2022).

| Compound Name                     | Molecular Formula                              | Major Class       | Reported Bioactivity                      |
|-----------------------------------|------------------------------------------------|-------------------|-------------------------------------------|
| 2,4-Di-tert-butylphenol           | C <sub>14</sub> H <sub>22</sub> O              | Phenolic compound | Antioxidant, antimicrobial                |
| Hexadecanoic acid (Palmitic acid) | C <sub>16</sub> H <sub>32</sub> O <sub>2</sub> | Fatty acid        | Antimicrobial, anti-inflammatory          |
| Phytol                            | C <sub>20</sub> H <sub>40</sub> O              | Diterpene alcohol | Antioxidant, anticancer, antimicrobial    |
| Octadecanoic acid (Stearic acid)  | C <sub>18</sub> H <sub>36</sub> O <sub>2</sub> | Fatty acid        | Emollient, antibacterial                  |
| Squalene                          | C <sub>30</sub> H <sub>50</sub>                | Triterpene        | Antioxidant, anticancer, immunomodulatory |
| Linoleic acid ethyl ester         | C <sub>20</sub> H <sub>36</sub> O <sub>2</sub> | Fatty acid ester  | Hypocholesterolemic, antioxidant          |
| β-Sitosterol                      | C <sub>29</sub> H <sub>50</sub> O              | Phytosterol       | Anti-inflammatory, cholesterol-lowering   |
| Campesterol                       | C <sub>28</sub> H <sub>48</sub> O              | Phytosterol       | Antioxidant, cardioprotective             |
| Stigmasterol                      | C <sub>29</sub> H <sub>48</sub> O              | Phytosterol       | Antiarthritic, anticancer,                |

|                         |                                               |              |                                        |
|-------------------------|-----------------------------------------------|--------------|----------------------------------------|
|                         |                                               |              | antimicrobial                          |
| Antraquinone derivative | C <sub>14</sub> H <sub>8</sub> O <sub>2</sub> | Polyphenolic | Antimicrobial, anticancer, antioxidant |

Phytochemicals in *Spathodea campanulata* Water Calyx Fluid That Can Act as Reducing Agents in Nanomaterial Synthesis

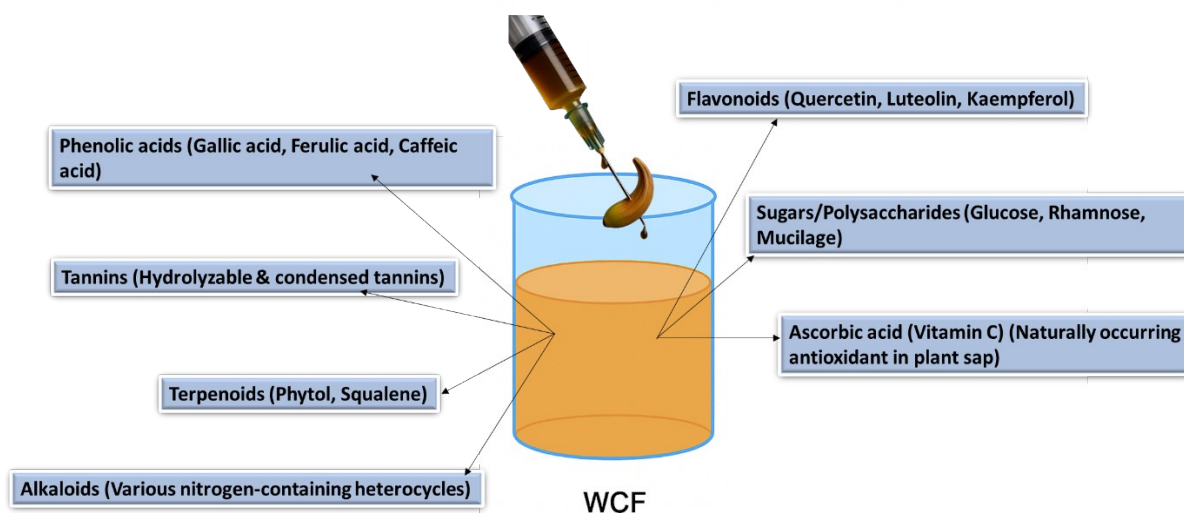

**Fig. S4.** Bioactive compounds present in *Spathodea campanulata* water calyx fluid that facilitate the reduction process during CS-Cu<sub>2</sub>O/ZnO nanocomposite formation.

**Example:** The relatively high adsorption capacity ( $\sim 1000 \text{ mg g}^{-1}$ ) observed for the Cs-Cu<sub>2</sub>O/ZnO nanocomposite can be attributed to the synergistic effect of the chitosan matrix and metal oxide components. The presence of abundant surface functional groups such as  $-\text{NH}_2$  and  $-\text{OH}$  in chitosan provides active binding sites for fluoride ions through electrostatic interaction and hydrogen bonding. In addition, the Cu<sub>2</sub>O and ZnO nanoparticles contribute to enhanced surface heterogeneity and metal-fluoride interactions, which further promote adsorption. The porous structure and high surface area of the nanocomposite facilitate greater accessibility of adsorption sites, thereby resulting in improved fluoride uptake compared with many previously reported adsorbents.

For example, when the initial fluoride concentration ( $C_0$ ) was  $1000 \text{ mg L}^{-1}$  and the equilibrium concentration ( $C_e$ ) decreased to  $0 \text{ mg L}^{-1}$  using  $0.05 \text{ g}$  of adsorbent in  $0.05 \text{ L}$  solution, the adsorption capacity was calculated as:

$$q_e = \frac{(1000 - 0) \times 0.05}{0.05} = 1000 \text{ mg g}^{-1}$$

**Table S3.** Effect of Coexisting Ions on Fluoride Adsorption by CS–Cu<sub>2</sub>O/ZnO Nanocomposite.

| Coexisting Ion                | Concentration (mg L <sup>-1</sup> ) | Fluoride Removal Efficiency (%) | Observations            |
|-------------------------------|-------------------------------------|---------------------------------|-------------------------|
| None (Control)                | —                                   | 98.5 ± 1.2                      | Maximum adsorption      |
| Cl <sup>-</sup>               | 50                                  | 96.8 ± 1.5                      | Negligible interference |
| SO <sub>4</sub> <sup>2-</sup> | 50                                  | 95.2 ± 1.7                      | Slight competition      |
| HCO <sub>3</sub> <sup>-</sup> | 50                                  | 93.6 ± 1.9                      | Moderate interference   |
| NO <sub>3</sub> <sup>-</sup>  | 50                                  | 96.0 ± 1.4                      | Minimal effect          |
| PO <sub>4</sub> <sup>3-</sup> | 50                                  | 90.5 ± 2.1                      | Significant competition |
| CO <sub>3</sub> <sup>2-</sup> | 50                                  | 92.8 ± 1.8                      | pH-related effect       |

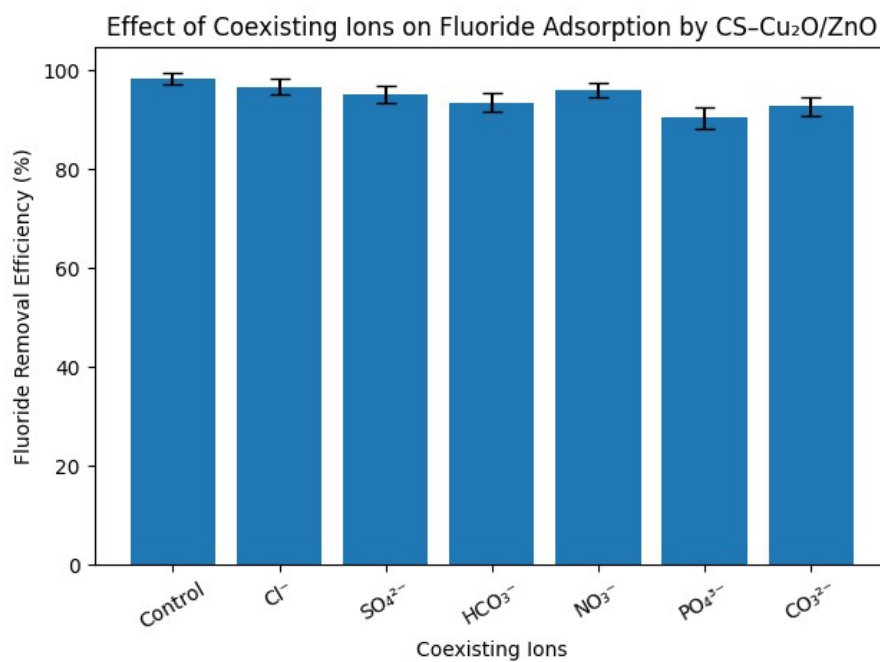

**Fig. S5.** Effect of coexisting ions on fluoride adsorption by CS–Cu<sub>2</sub>O/ZnO nanocomposite. Error bars represent standard deviation (n = 3).

**Table S4.** Fluoride Adsorption in Model vs Real Water Matrices and Matrix-Suppression Coefficient

| Water Matrix       | Initial Fluoride (mg L <sup>-1</sup> ) | Adsorption Capacity, q <sub>e</sub> (mg g <sup>-1</sup> ) | Removal Efficiency (%) | MSC (q <sub>e,real</sub> / q <sub>e,model</sub> ) |
|--------------------|----------------------------------------|-----------------------------------------------------------|------------------------|---------------------------------------------------|
| Model Water        | 100                                    | 980.0 ± 12.5                                              | 98.5 ± 1.2             | 1.00                                              |
| Tap Water          | 100                                    | 945.0 ± 15.2                                              | 95.1 ± 1.5             | 0.96                                              |
| Groundwater Sample | 100                                    | 910.0 ± 18.4                                              | 92.3 ± 1.8             | 0.93                                              |

**Table S5.** Cycling Performance and Regeneration Efficiency of the Nanocomposite.

| Cycle | Removal efficiency (%) | Capacity retention (%) | Mass loss (%) | Cu leaching (mg L <sup>-1</sup> ) | Zn leaching (mg L <sup>-1</sup> ) |
|-------|------------------------|------------------------|---------------|-----------------------------------|-----------------------------------|
| 1     | 98.5 ± 1.2             | 100                    | —             | ND                                | ND                                |
| 2     | 96.2 ± 1.5             | 97.6                   | 1.2           | 0.005                             | 0.007                             |
| 3     | 93.8 ± 1.7             | 95.2                   | 2.0           | 0.007                             | 0.009                             |
| 4     | 91.5 ± 1.8             | 92.9                   | 2.8           | 0.009                             | 0.011                             |
| 5     | 88.7 ± 2.0             | 90.0                   | 3.5           | 0.011                             | 0.013                             |

ND = Not detected. Values represent mean ± standard deviation (n = 3).

## References:

- Karunanithi T., Palanivelu K., Meenakshi S., 2019. A novel acid modified alumina adsorbent with enhanced defluoridation property. *Journal of Environmental Management*, 235, 358–367.
- Khandbahale D.S., 2022. Investigation of 'African Tulip Tree-Calyx Water' as a novel nutritional supplement and novel food source. *Science, Technology and Development*, 11(2), 447–449.
- Martin P.A., Jayanthi D., Thamizhseran N., 2019. Bio-Physicochemical studies on water calyx fluid in the African Tulip Tree, *Spathodea campanulata* P. Beauv. *Pharmacognosy Journal*, 11(3), 594–599.
- Ramesh S., Radhakrishnan S., Kannan N., 2019. Chitosan-based nanocomposite incorporated with Fe–Al oxide for defluoridation of drinking water. *Journal of Hazardous Materials*, 367, 629–639.
- Roy S., Chattoraj S., Mukherjee A., 2021. Recently developed adsorbing materials for fluoride removal from contaminated drinking water: A review. *Sustainability*, 13, 7061.
- Sharma G., Naushad M., Kumar A., Al-Muhtaseb A.H., Ghfar A.A., Khan M.R., Stadler F.J., 2017. Comparative kinetics and thermodynamic studies of removal of Cr(VI) and Pb(II)

using a new composite: Pectin-based Fe–Al–Ni trimetallic oxide nanocomposite. *Chemical Engineering Journal*, 308, 438–447.

Singh T.S., Pant K.K., 2008. Mg–Al mixed oxide adsorbent for defluoridation of drinking water. *Journal of Hazardous Materials*, 155, 423–430.
